# Supplementary material
Source: PubMed Central journal article supplement (PMC7797214)
Supplement: cvaa066_supplementary_materials.pdf [file cvaa066_supplementary_materials.pdf]

## Supplementary Materials

### **Pim1 Maintains Telomere Length in Mouse Cardiomyocytes by Inhibiting TGF $\beta$ Signaling**

David E Ebeid<sup>1\*</sup>, Farid G Khalafalla<sup>1,2\*</sup>, Kathleen M Broughton<sup>1</sup>, Megan M Monsanto<sup>1</sup>, Carolina Y Esquer<sup>1</sup>, Veronica Sacchi<sup>1,3</sup>, Nirmala Hariharan<sup>1,4</sup>, Kelli I Korski<sup>1</sup>, Maryam Moshref<sup>1,5</sup>, Jacqueline Emathingier<sup>1</sup>, Christopher T Cottage<sup>1</sup>, Pearl J Quijada<sup>1,6</sup>, Jonathan H Nguyen<sup>1</sup>, Roberto Alvarez Jr<sup>1</sup>, Mirko Völkers<sup>1,7</sup>, Mathias H Konstandin<sup>1,7</sup>, Bingyan J Wang<sup>1</sup>, Fareheh Firouzi<sup>1</sup>, Julian M Navarrete<sup>1</sup>, Natalie A Gude<sup>1</sup>, Marie-Jose Goumans<sup>8</sup>, Mark A Sussman<sup>1#</sup>

<sup>1</sup> Department of Biology, San Diego State University, San Diego, CA, USA

<sup>2</sup> Current Address: Department of Pharmaceutical and Biomedical Sciences, College of Pharmacy, California Health Sciences University, Clovis, CA, USA

<sup>3</sup> Current Address: Regenerative Medicine Department, Genomic Institute of the Novartis Research Foundation, San Diego, CA, USA

<sup>4</sup> Current Address: Department of Pharmacology, University of California at Davis, Davis, CA, USA

<sup>5</sup> Current Address: Department of Pathology, Microbiology, and Immunology, School of Veterinary Medicine, University of California, Davis, Davis, California, USA

<sup>6</sup> Current Address: Aab Cardiovascular Research Institute, Department of Medicine, University of Rochester School of Medicine and Dentistry, Rochester, NY, USA

<sup>7</sup> Current Address: Department of Cardiology, University of Heidelberg, Heidelberg, Germany

<sup>8</sup> Current Address: Department of Molecular Cell Biology, Leiden University Medical Center, Leiden, Netherlands

\* Co-First Authors

#### # Correspondence:

Mark A. Sussman, PhD

Department of Biology

San Diego State University

North Life Sciences, 426

5500 Campanile Drive

San Diego, CA- 92182

(619)-594-2983

[heartman4ever@icloud.com](mailto:heartman4ever@icloud.com)

**Figure S1**

**a**

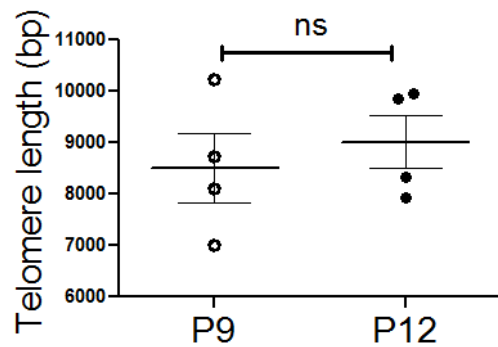

**Figure S1: A549 cells maintain telomeres in culture. a** Telomere lengths of A549 cells after 3 passages in culture measured by qPCR. N=4, Mean  $\pm$  SEM, Student *t* test.

**Figure S2**

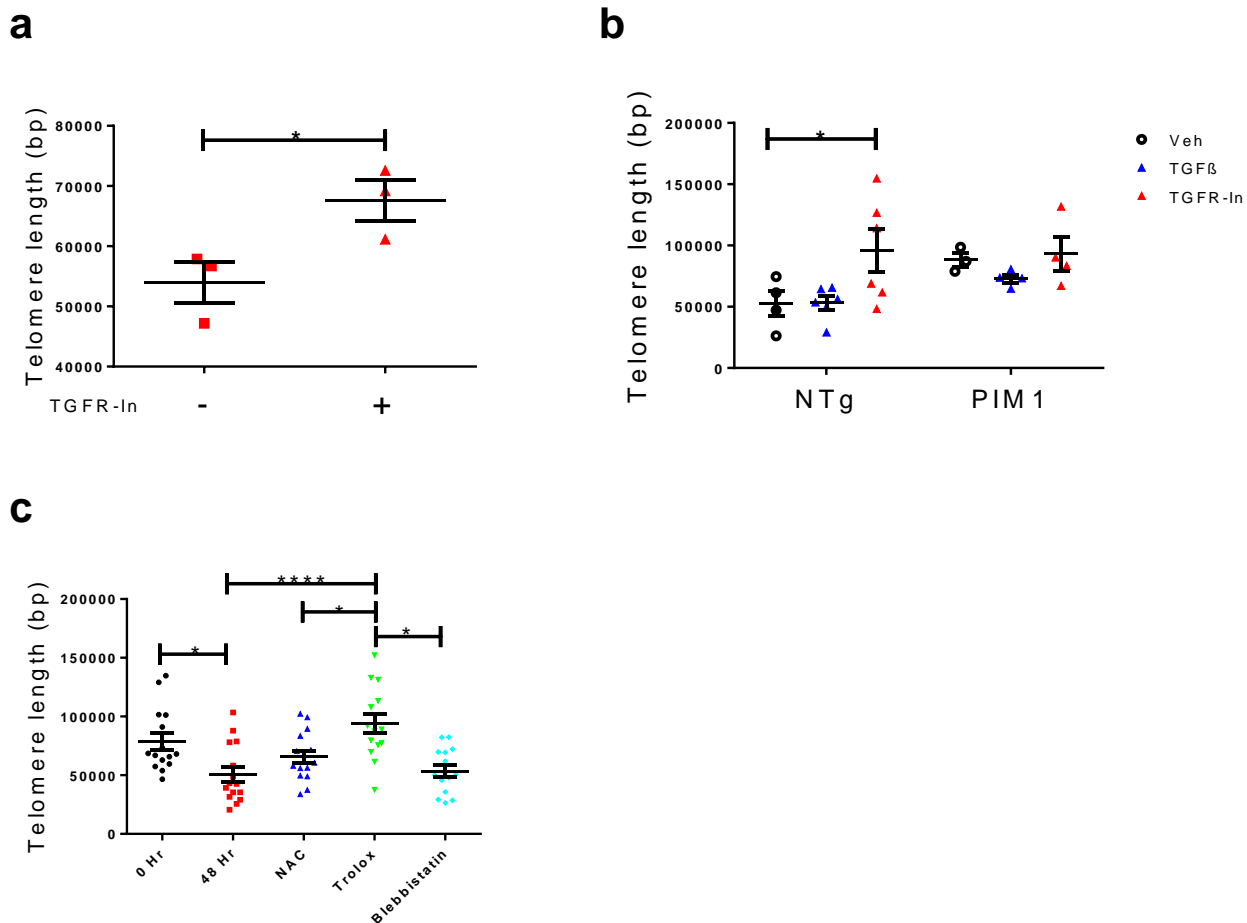

**Figure S2: Pharmacological maintenance of telomeres.** **a** Telomere lengths of Pim1-KO cardiomyocytes after treatment with TGFR-In for 48 hours. N=3, Mean  $\pm$  SEM, \* $p$ <0.05 as measured by Student  $t$  test. **b** Telomere lengths of NTg or PIM1 cardiomyocytes treated with TGF $\beta$  or TGFR-In for 48 hours. N=3-6 per group, Mean  $\pm$  SEM, \* $p$ <0.05 as measured by 1-way ANOVA followed by Tukey's multiple comparison test. **c** Telomere lengths of cardiomyocytes at 0 hours or after 48 hours of culture with NAC, trolox, or blebbistatin. N=3 biological x 5 technical replicates, Mean  $\pm$  SEM, \* $p$ <0.05, \*\*\*\* $p$ <0.0001 as measured by 1-way ANOVA followed by Tukey's multiple comparison test.

**Figure S3**

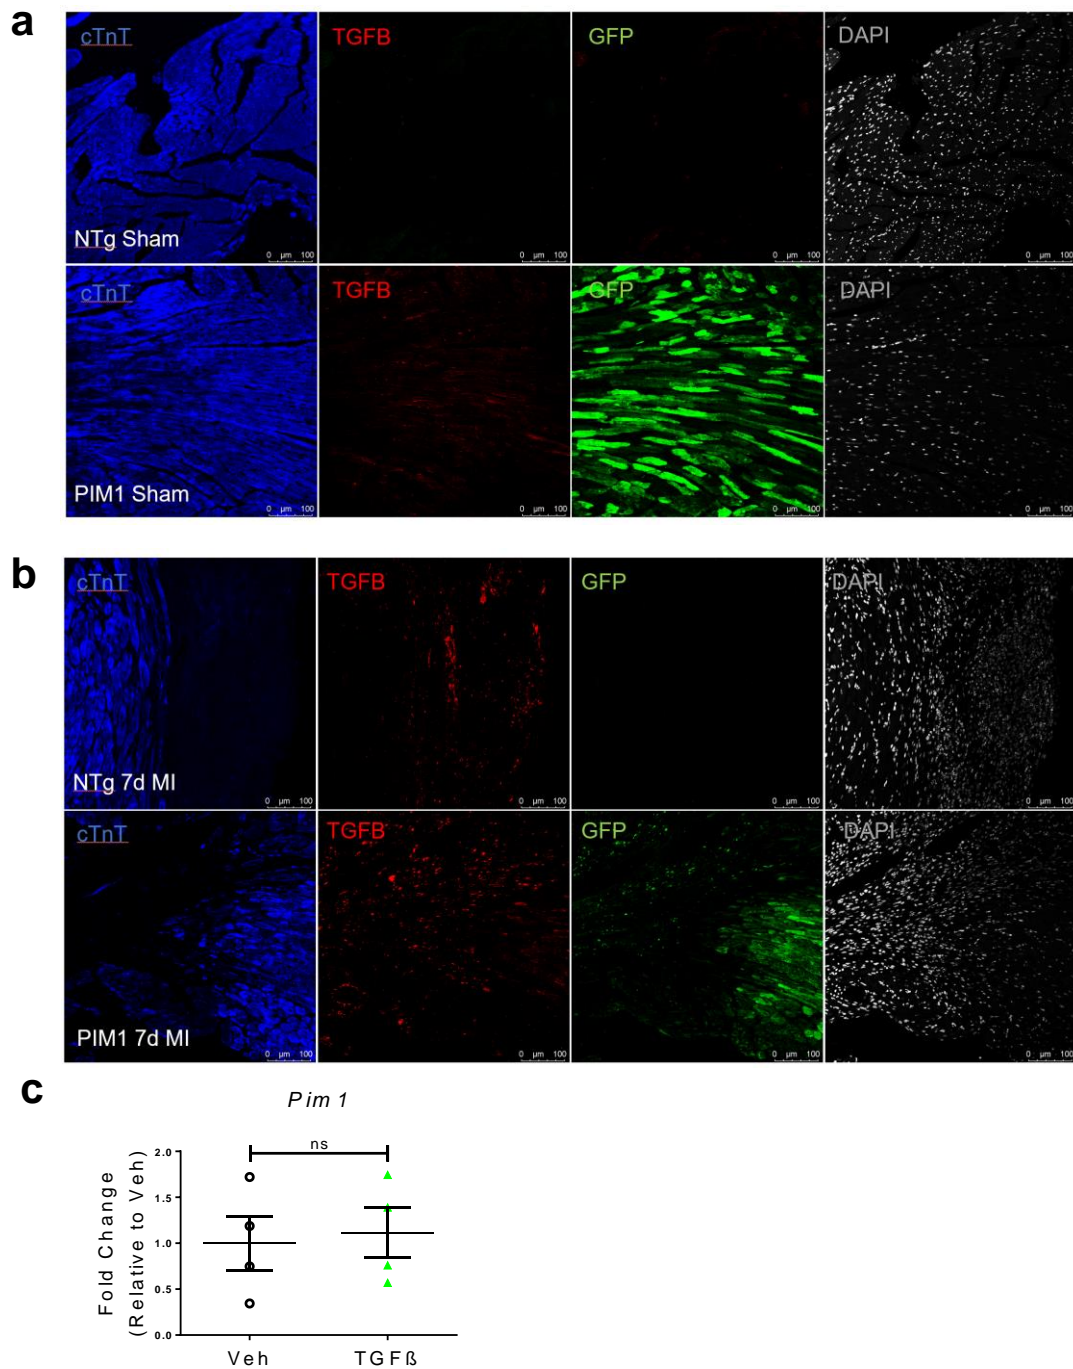

**Figure S3: Pim1 and TGFβ do not exhibit feedback relationships. a** TGFβ expression in heart sections from sham animals and **b** 7 days post MI. **c** *Pim1* expression in NTg cardiomyocytes after treatment with TGFβ for one hour measured by qPCR. N=4, Mean ± SEM, Student *t* test.

**Figure S4**

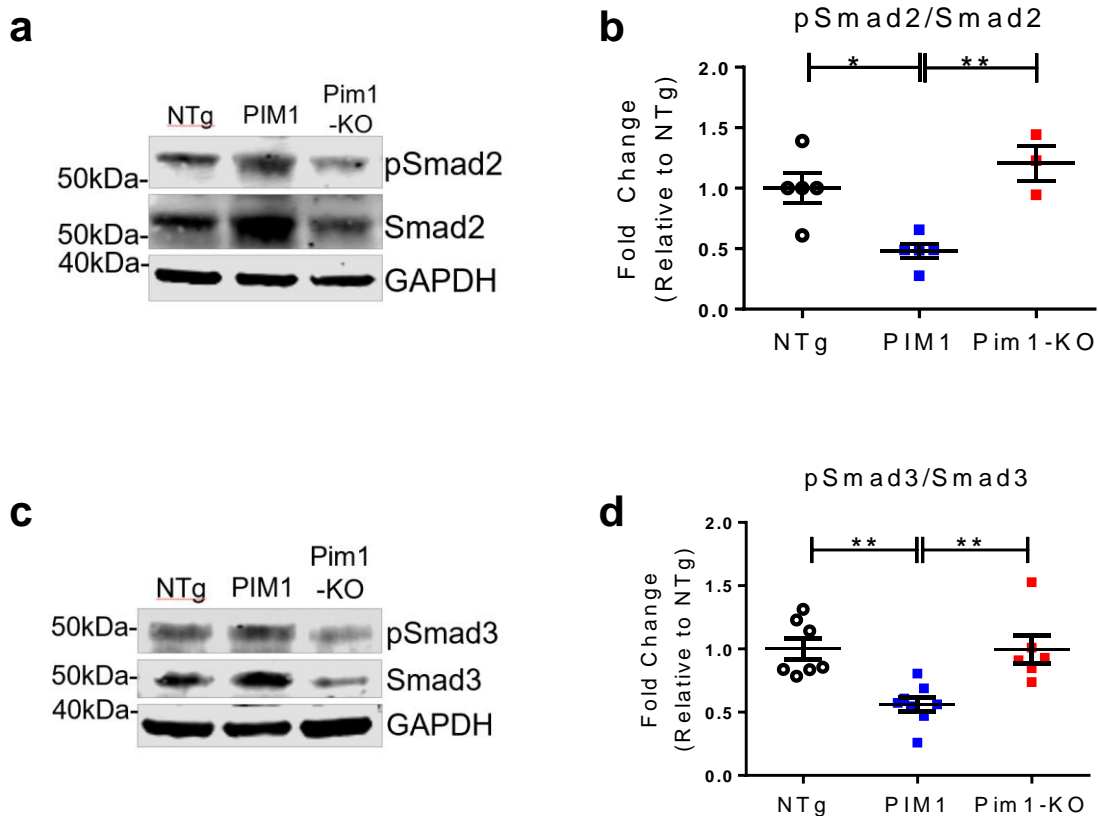

**Figure S4 Phosphorylation of Smads is blunted by PIM1 in cardiomyocytes. a** Western blot image of pSmad2 and total Smad2 in NTg, PIM1, and Pim1-KO cardiomyocytes. **b** Quantification of pSmad2 over total Smad2 protein expression in cardiomyocytes. N=3-5 per group, Error bars represent SEM, \* $p < 0.05$ , \*\* $p < 0.01$  as measured by 1-way ANOVA followed by Tukey's multiple comparison test. **c** Immunoblot image of pSmad3 and total Smad3 in cardiomyocytes with **d** respective quantification. N=6-8 per group, Error bars represent SEM, \*\* $p < 0.01$  as measured by 1-way ANOVA followed by Tukey's multiple comparison test.
